# Supplementary material
Source: publisher figshare collection journal article supplement (https://acs.figshare.com/ndownloader/files/3972817)
Supplement: Supplementary file 1 [file 3972817]

## Supporting Information

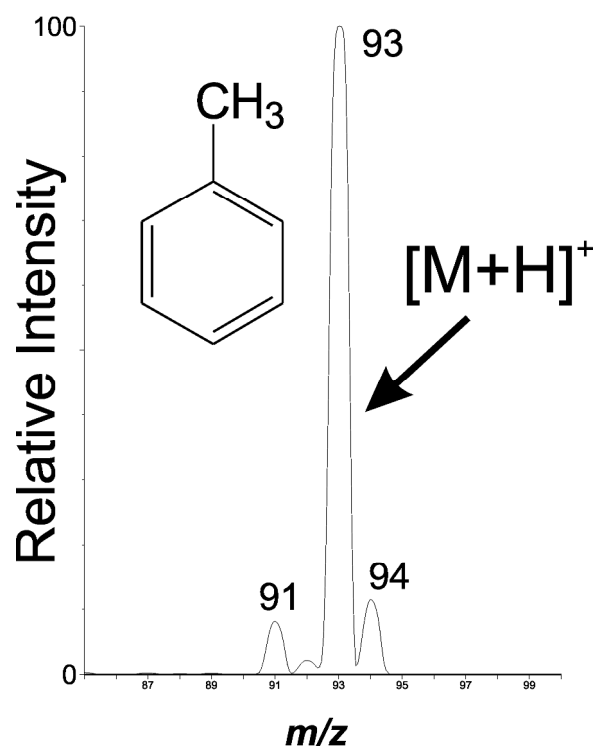

**Supplementary Figure 1.** Mass spectrum recorded from toluene (nominal mass = 92), under ambient conditions (open source) by exposing vapor emanating from a sample of liquid toluene placed in an open HePI source. Spectra ( $m/z$  20 – 120) were acquired under multiple-channel analysis (MCA) conditions on a Quattro Ultima mass spectrometer.

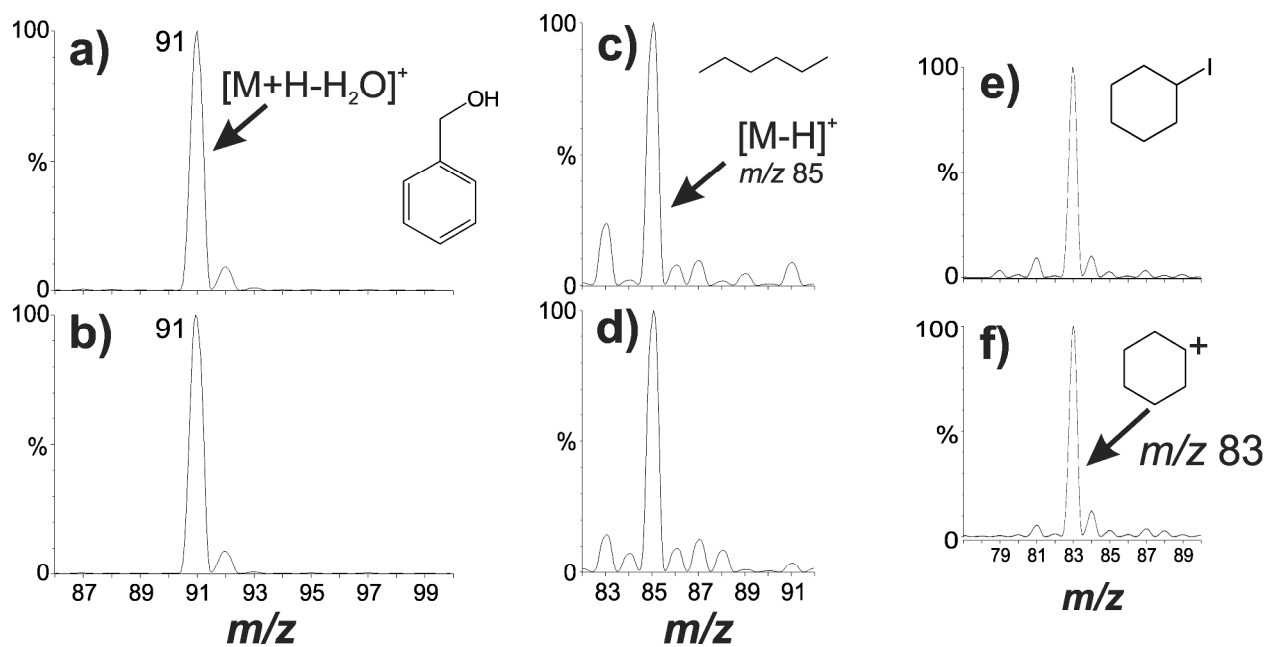

**Supplementary Figure 2.** HePI mass spectra recorded by exposing vapor emanating from a sample of benzyl alcohol (a), hexane (c), and cyclohexyl iodide (e). Spectra ( $m/z$  20 – 120) were acquired under multiple-channel analysis (MCA) conditions on a Quattro Ultima mass spectrometer. Spectra b, d, and f were recorded after a cotton swab soaked in  $D_2O$  was inserted to the source

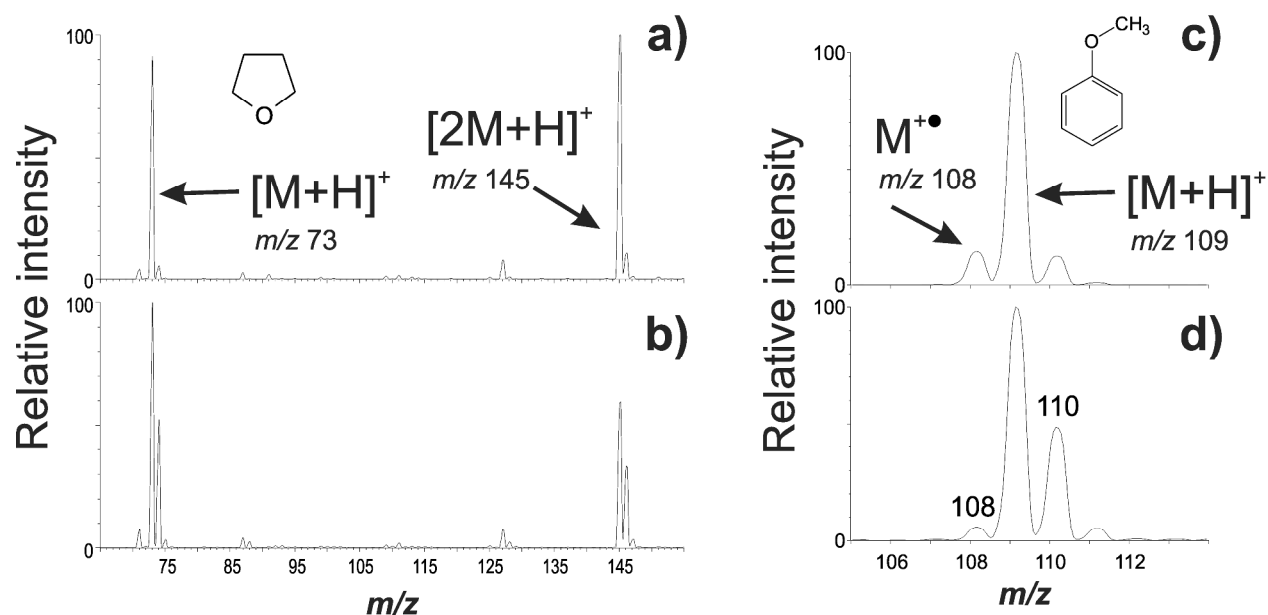

**Supplementary Figure 3.** HePI mass spectra recorded by exposing vapor emanating from a sample of tetrahydrofuran (a) and anisole (c). Spectra ( $m/z$  20 – 160) were acquired under multiple-channel analysis (MCA) conditions on a Quattro Ultima mass spectrometer. Spectra b, and d were recorded after a cotton swab soaked in  $D_2O$  was inserted to the source

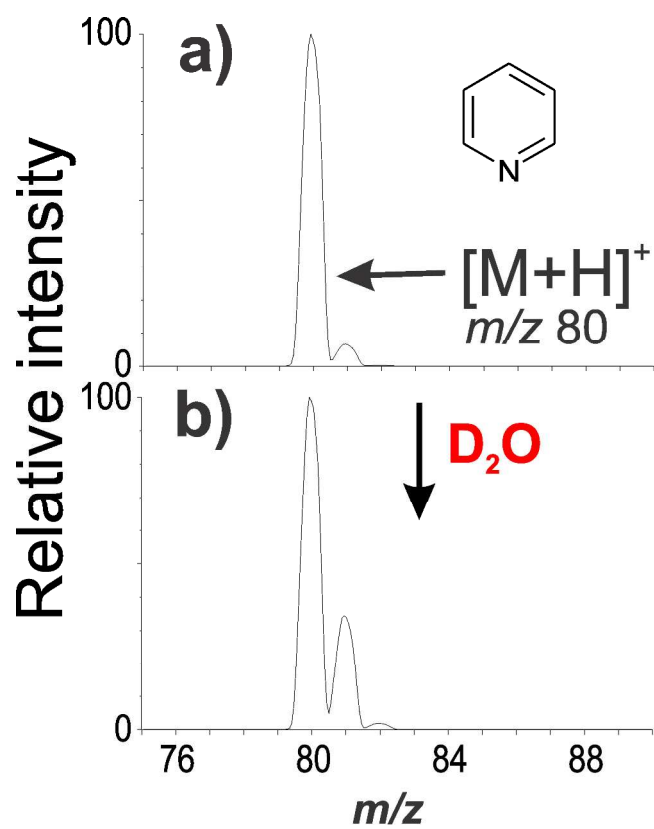

**Supplementary Figure 4.** HePI mass spectra recorded from pyridine before (a) and after (b) a cotton swab soaked in  $D_2O$  was introduced to the closed source.

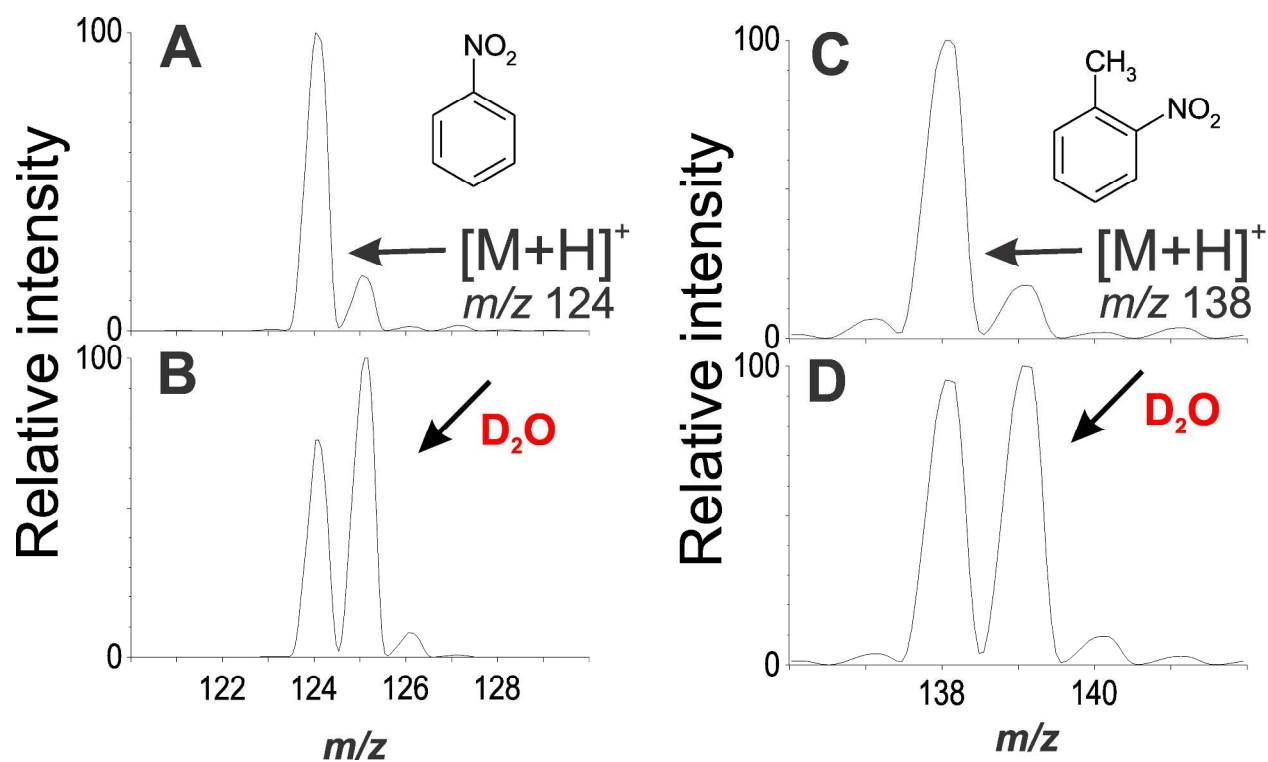

**Supplementary Figure 5.** HePI mass spectra recorded from nitrobenzene (a) and *o*-nitrotoluene (b) samples placed in a closed source. After 20 seconds of data acquisition a cotton swab soaked in  $D_2O$  was introduced and spectra were recorded for further 2 min (c, and d).

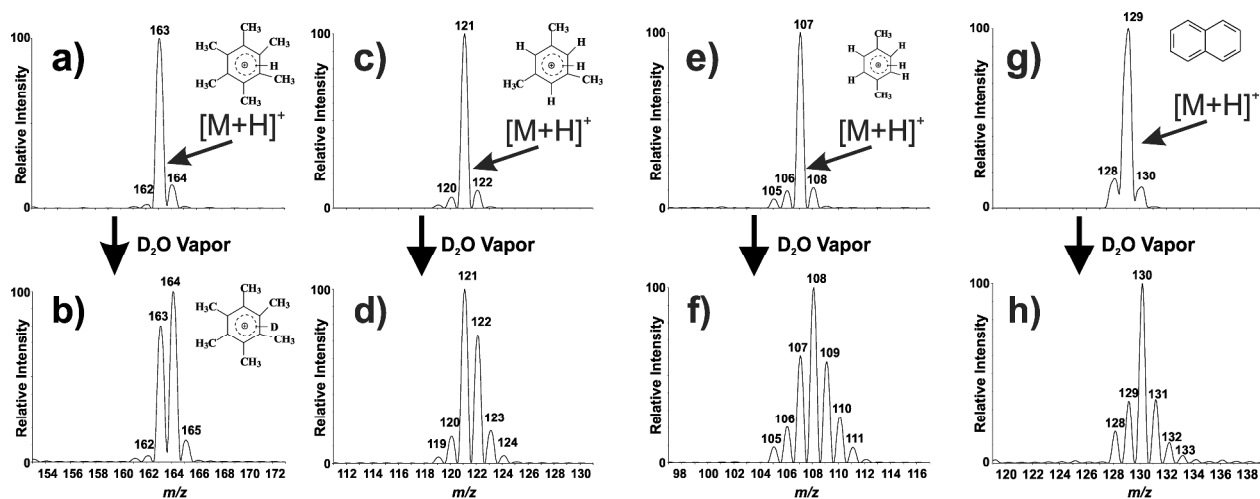

**Supplementary Figure 6.** HePI mass spectra recorded by exposing vapor emanating from a sample of hexamethylbenzene (a), 1,3,5-trimethylbenzene (mesitylene) (c), *p*-xylene (e), and naphthalene (g) in a closed source. After 20 seconds of data acquisition, a cotton swab soaked in D<sub>2</sub>O was introduced and spectra were recorded for further 2 min (b, d, f, h).
